# Supplementary material for: Multifactorial effects of warming, low irradiance, and low salinity on Arctic kelps
Source: Copernicus journal article supplement (doi:10.5194/egusphere-2023-1875), 2023-09-26
Supplement: Supplementary file [file egusphere-2023-1875-AC2-supplement.pdf]

Reviewer 1

## GENERAL COMMENTS

Lebrun et al. present a timely and well-designed study investigating the response of four habitat-building kelp species to a warming Arctic by means of a multi-factorial mesocosm experiment, in which they simulate predicted temperature increases along with decreased irradiance and decreased salinity under increased glacial melt scenarios over six weeks. They identify species-specific responses in physiology (growth, chlorophyll a, carbon:nitrogen ratio) and gene expression, indicating specific acclimation mechanisms and responses, which mainly respond to temperature as a key driver. In contrast to the majority of studies in this field, which often observe short-term stress responses, Lebrun et al. performed a 6-week experiment which allows for organismal acclimation to the novel environment, as evident in the lack of stress responses and stable growth rates across treatments. They therefore show that the kelps' physiology is capable of acclimating to these interactive environmental effects, potentially allowing their range expansion into newly ice-free areas. The manuscript is well written and the conclusions are drawn based on a thorough analysis of the data. My main suggestions are to include a short description of the significance of the fixed factors in the results section before reporting the pairwise comparisons, and to consider the effect of temperature on enzyme reaction rates in the discussion. Apart from this, I only have minor questions and suggestions. This manuscript will be a valuable contribution to the field and I'm looking forward to seeing the paper published!

**We thank reviewer#1 for their general overview and acknowledgment of the work put into this study. We have considered the suggestions by reviewer#1 and have incorporated the changes to the revised manuscript.**

## SPECIFIC COMMENTS

### ABSTRACT

The abstract provides a concise overview over the premise, study design, key results and implications. Only the growth rates are not mentioned in the abstract. I would suggest to mention that growth remained stable for each species across treatments, which in my eyes is one of the most important results showing that Arctic warming may not be detrimental per se.

**We have added the details about stable growth into the abstract.**

### INTRODUCTION

The introduction is short but concise and presents Arctic kelp forests and the changing environment they are facing. A more general audience might appreciate a short taxonomic classification of kelps, e.g. as large brown algae (Phaeophyceae, Laminariales). Do all four tested species occur together in mixed assemblies or are they restricted to different depths in situ?

**We have added details about the taxonomy of kelps into the introduction as well as information about the density of kelp found in Kongsfjorden. Briefly, yes, these kelp species do co-occur between depths from 5 to 10 m (Bartsch et al., 2016). This was verified by our diving team and with drone surveys when kelps were collected.**

## METHODS

The methods are described in detail and allow replication, provided that the study by Miller et al., which contains the detailed setup of the mesocosm experiment, will be published before this manuscript. Before the start of the experiment, were the holding tanks maintained at in situ conditions? Why were *S. latissima* and *H. nigripes* chosen for the transcriptomic analysis?

**The Miller et al. (2024) paper has been published and is available open access (<https://bg.copernicus.org/articles/21/315/2024/>). The reference has been updated. Yes, all holding tanks were maintained with flowing ambient seawater until the start of the experiment. This information has been added to the revised manuscript. We chose to only focus on the gene expression patterns in *S. latissima* and *H. nigripes* because *S. Latissima* was the most abundant in terms of biomass in the sampling area and appeared to be in good physical health upon visual inspection at  $T_{\text{final}}$ . *H. nigripes* was chosen because it is an endemic Arctic species. We have added this reasoning to the revised manuscript in section 2.8.**

## RESULTS

The results are presented in a clear and focused manner with good statistical support. However, throughout the reports of the physiological responses, the authors only report pairwise comparisons. I would prefer the paragraphs to begin with an overview of the fixed factor significance (Chi-square tests) to assess significant differences between species and treatments in general, and their interaction, i.e. whether species respond differently to the different treatments, before moving on to pairwise comparisons. The Figures are clear and intuitive, except for the display of significant differences in Figure 3 (*A. esculenta*), which could be improved. Figure 2C seems to be missing the light blue control treatment.

**We have added additional content throughout the separate sections in the results to highlight the model analyses by treatment and species. This adds clarity to the detailed descriptions of the pairwise comparisons. Figure 3 has been modified to better display significant differences. Figure 2C shows the difference in PAR between the treatments and the control, that is why control values are not shown.**

## DISCUSSION

The authors provide a detailed placement of their data within the literature, especially macroalgae physiology, and relate the different responses between species to their resilience towards Arctic warming. A key point to be added to the discussion is the relationship of enzyme activity and temperature, especially with respect to the RNAseq results (down-regulation of stress responses and fundamental cellular machinery). For instance, the combination of cold temperature and high irradiance can induce photoinhibition due to slower reaction rates of crucial enzymes such as RuBisCO, triggering stress responses. In general, to maintain cellular functions, slower reaction rates at cold temperature can be compensated by higher protein expression. The authors mention that future warming may reduce stress responses (ln. 361), to which I would like to add that the tested high temperatures are close to the physiological optima

described for the species. Regarding the reduced C:N ratio in *S. latissima* it may make sense to relate this to the increased growth rate in this species.

**We agree with the reviewer and appreciate the comment. We have added several sentences to the discussion concerning this point about temperature optima, the down-regulation of stress response, and the growth rate of *S. latissima*. Please see the lines 434 – 442 in the revised manuscript.**

#### ADDITIONAL

At the moment there is no data availability statement. I would advise the authors to archive at least the RNAseq data in a public repository.,

**We have added a detailed list of differentially expressed genes in the supplementary material as suggested by Reviewer #1. A GitHub link has been added in the Code availability section. It contains the code used to carry out the majority of bio-info processes. It contains in particular the notebook which made it possible to create the graphs in Fig. 7, as well as all the functional annotations, and the results of the DEGs (the two compressed files added to the supplementary material).**

#### MINOR COMMENTS

Ln. 29 – gene expression patterns: **We have made this change.**

Ln. 94 – Here it is described how temperature and salinity were adjusted, so I think it makes sense to add that irradiance was adjusted using filters here, too: **We have added details about light attenuation following this sentence in the revised manuscript.**

Ln. 109 – with a PAR sensor (LI-COR xyz): **This is a LI-COR model 192. This has been added.**

Ln. 111 – the difference between the inner and outer: **“Between” has been added.**

Ln. 120 – consider adding that the meristem is located above the stipe-blade transition zone for a more general audience: **This has been added in the revised manuscript**

Ln. 125 – only on  $t_{final}$ ? **Yes, this was only done at  $T_{final}$  as proper identification of *H. nigripes* is destructive and requires sampling the stipe for a mucous test and genetic analysis.**

Ln. 129 – Were the samples kept frozen during extraction?: **No, as mentioned, extraction was performed in the dark at 4°C.**

Ln. 132 – What is the  $F_a$  fluorescence? I would prefer if Lorenzen’s formula was reproduced in the text to put  $F_0$  and  $F_a$  into context:  **$F_a$  is the fluorescence after acidification. This and the equation have been added to the revised manuscript.**

Ln. 144 – Suggestion: 2 cm above the stipe-blade transition. Base of the stipe to me sounds like it is basally located near the holdfast. **We have changed this to “base of the frond” here and in the subsequent sentences.**

Ln. 149 – with dist0: [...] to the hole: **This has been corrected to “from the base of the frond to the hole.”**

Ln. 155 – it might be useful to mention that the protocol combines a CTAB extraction followed with a commercial Qiagen kit. **Done.**

Ln. 167 – using rnaSPAdes: **“with” has been changed to “using”**

Ln. 191 – Table C1. **We are not quite sure of this comment. The table in reference is in the supplementary material and is referenced as S1 rather than C1. We would be happy to correct this if there is a mistake or if further clarity could be given to the comment.**

Ln. 217 – Consider replacing “different” by “higher than” **We have made the change.**

Ln. 235 – According to the Chi-square test (Table F1), they are strongly affected. This is likely due to the much faster growth of *S. latissima* in general, but this should at least be acknowledged shortly. **We have acknowledged the faster growth rate in the revised manuscript as suggested by the reviewer’s following comment directly below referring to line 238.**

**Table F1: Analysis of deviance (Type II Wald chi-square tests) in a generalized linear mixed model to predict the growth rate.**

|                   | Chisq  | Df | Pr(>Chisq)    |
|-------------------|--------|----|---------------|
| species           | 91.310 | 2  | <2.2e-16 ***  |
| treatment         | 98.991 | 4  | <2.2e-16 ***  |
| species:treatment | 39.729 | 8  | 3.599e-06 *** |

Ln. 238 – It might be worth mentioning that the growth of *S. latissima* is higher by an order of magnitude: **We have added this to the revised manuscript.**

Ln. 245 – Principal component analysis of global gene expression revealed ...: **Modified**

Ln. 248 – classified = functionally annotated?: **Absolutely, we have added a clarification.**

Ln. 258 – 458 down-regulated genes [...] classified down-regulated: **We do not fully understand the point here. However, we are confident that this has been clarified as per the response to the previous comment.**

Ln. 268 – no negative impacts: **Corrected**

Ln. 283 – and lower irradiance treatment: **Corrected**

Ln. 290 – Short-term acclimation may not be the right term, it may rather be an existent adaptation to effectively use lower irradiance? Niedzwiedz & Bischof (2023; doi.org/10.1002/lno.12312) show that Arctic *A. esculenta* has a lower compensation irradiance than *S. latissima* at 3-7°C.: **We fully agree and have replaced as suggested. This reference has been added.**

Ln. 295 – Diehl and Bischof (2021): **Corrected**

Ln. 296 – the chl a content of *S. latissima*: **Corrected**

Ln. 305 – Might the nitrogen limitation be related to the 10x higher growth in *S. latissima*? **We do not believe this to be the case as previous studies have shown a positive correlation between nitrate levels and growth rate for *S. latissima***

**Examples:**

**Forbord et al. 2021. Initial short-term nitrate uptake in juvenile, cultivated *Saccharina latissima* (Phaeophyceae) of variable nutritional state**

**Jevne et al. 2020. The Effect of Nutrient Availability and Light Conditions on the Growth and Intracellular Nitrogen Components of Land-Based Cultivated *Saccharina latissima* (Phaeophyta)**

Ln. 314 – higher in the T2 treatment (1.68 ...): **Corrected**

Ln. 332 – in the control indicating: **Corrected**

Ln. 348 – potentially because increased enzyme reaction rates compensate for the reduced expression (see general comment above) **We have added several lines at this point in the text in response to the general comment above.**

Ln. 384 – and biotic interactions, see the reduced competition of sporophyte recruitment against *A. esculenta* in Zacher et al. (2019): **Absolutely, this was added.**

Ln. 393 – acclimation: **Corrected**

Ln. 395 – So growth is plastic only in specific seasons? Or does this sentence refer to general seasonal growth patterns?: **This was clarified: “For example, its growth shows a high phenotypic plasticity that appears to be constrained within specific seasonal growth patterns in accordance with their environment of origin (Spurkland and Iken, 2011).”**

Ln. 405 – optimum: **Corrected**

Ln. 406 – acclimation: **Corrected**

Ln. 426 – Is it really more than one co-author on the editorial board?: **No but we think this is a general sentence proposed by BG**

Ln. 703 / Figure 7 – what is the meaning of the shading behind the bars for T2?: **This was a glitch and has been removed in the new revised figure**
